# Supplementary material for: Cisplatin cytotoxicity: a theoretical study of induced mutations
Source: Royal Society of Chemistry journal article supplement (doi:10.1039/c2cp40515f), 2012-01-01
Supplement: c2cp40515f.pdf [file c2cp40515f.pdf]

## Cisplatin Cytotoxicity: a Theoretical Study of Induced Mutations

José P. Cerón-Carrasco<sup>a</sup>, Denis Jacquemin<sup>a\*</sup> and Emilie Cauët<sup>b</sup>

<sup>a</sup> CEISAM, UMR CNRS 6230, BP 92208, Université de Nantes, 2, Rue de la Houssinière, 44322 Nantes, Cedex 3, France, <sup>b</sup>Service de Chimie Quantique et Photophysique, Université Libre de Bruxelles, 50 Avenue F. D. Roosevelt, B-1050 Bruxelles, Belgium.

*\*e-mail: denis.jacquemin@univ-nantes.fr*

### **Supporting Information Material:**

- **Optimised high-layer geometries: p. S2**
- **Atomic charges used during the MD simulations: p. S25**

**Method 1 – canonical structure**

|   |             |             |             |
|---|-------------|-------------|-------------|
| N | -5.05093200 | -1.07252200 | -0.36308900 |
| C | -5.05649800 | -0.45714600 | -1.57332500 |
| N | -3.85586300 | -0.50425100 | -2.11661800 |
| C | -3.05673300 | -1.22667200 | -1.25166700 |
| C | -1.67481800 | -1.59073400 | -1.33565600 |
| O | -0.91756300 | -1.33600900 | -2.26543200 |
| N | -1.27888600 | -2.29086500 | -0.20618400 |
| C | -2.10351100 | -2.64232800 | 0.84426800  |
| N | -1.57017000 | -3.33973900 | 1.83402800  |
| N | -3.38949100 | -2.30484600 | 0.90617000  |
| C | -3.78808700 | -1.60163200 | -0.14522600 |
| H | -5.91625900 | 0.02434600  | -2.01079600 |
| H | -0.27361200 | -2.56968900 | -0.21013600 |
| H | -0.57273000 | -3.56458900 | 1.84821100  |
| H | -2.19216800 | -3.72736200 | 2.52317200  |
| N | -2.54841800 | 2.38021200  | 0.75953500  |
| C | -3.28234900 | 1.99238400  | -0.31724800 |
| N | -2.51190600 | 1.80526100  | -1.37099900 |
| C | -1.20465100 | 2.04274700  | -0.96112300 |
| C | 0.06779600  | 1.85261900  | -1.60153300 |
| O | 0.28605800  | 1.54283600  | -2.77593700 |
| N | 1.11166100  | 2.06546000  | -0.71765400 |
| C | 0.98383500  | 2.54222800  | 0.57025300  |
| N | 2.09085100  | 2.85549100  | 1.22891400  |
| N | -0.19111800 | 2.70691400  | 1.15826200  |
| C | -1.21834300 | 2.40878500  | 0.37513500  |
| H | -4.34948400 | 1.84935100  | -0.30128500 |
| H | 2.04100000  | 1.85788300  | -1.11596700 |

|    |             |             |             |
|----|-------------|-------------|-------------|
| H  | 3.00039600  | 2.57035300  | 0.87565100  |
| H  | 1.98163900  | 3.24326000  | 2.15233300  |
| N  | 5.77071200  | 0.54098700  | -1.25731000 |
| C  | 4.46233500  | 1.01503100  | -1.00329600 |
| O  | 4.15248800  | 1.43002900  | 0.10592500  |
| N  | 3.56558100  | 1.01397600  | -2.01957200 |
| C  | 3.88088400  | 0.55428800  | -3.21367200 |
| N  | 2.91105200  | 0.57279600  | -4.14798500 |
| C  | 5.17376100  | 0.00721700  | -3.49587500 |
| C  | 6.08079700  | 0.04348900  | -2.49192000 |
| H  | 2.03697000  | 1.02293000  | -3.88172600 |
| H  | 3.13628200  | 0.46832900  | -5.12307800 |
| H  | 5.43695600  | -0.38344700 | -4.46720800 |
| H  | 7.09692400  | -0.30807200 | -2.63790900 |
| N  | 3.33421600  | -2.88537300 | 1.23468800  |
| C  | 1.95694000  | -2.93613700 | 0.93395800  |
| O  | 1.14729300  | -3.23003000 | 1.80427300  |
| N  | 1.55876100  | -2.64241300 | -0.32611900 |
| C  | 2.42909900  | -2.34601900 | -1.27890800 |
| N  | 1.94073400  | -2.03333000 | -2.47993500 |
| C  | 3.84003600  | -2.35695800 | -1.02636400 |
| C  | 4.22987700  | -2.60475000 | 0.24227400  |
| H  | 0.93278500  | -1.92242900 | -2.56989400 |
| H  | 2.53928500  | -1.72248700 | -3.22460100 |
| H  | 4.55977000  | -2.17380100 | -1.80965300 |
| H  | 5.27362300  | -2.59579700 | 0.52468600  |
| Pt | -2.95976700 | 0.98778400  | -3.19439800 |
| N  | -3.29607000 | -0.07554700 | -4.96746300 |
| N  | -1.94144000 | 2.57201300  | -4.10455800 |

|   |             |             |             |
|---|-------------|-------------|-------------|
| H | -2.70634600 | -0.90832300 | -4.90518000 |
| H | -4.25651400 | -0.40649700 | -5.02896000 |
| H | -2.18212000 | 3.46254700  | -3.67266300 |
| H | -0.94762500 | 2.39104700  | -3.88556000 |
| H | -3.07782000 | 0.38671900  | -5.84628600 |
| H | -2.04203700 | 2.69549700  | -5.10802700 |

**Method 1 – G6C rare tautomer**

|   |             |             |             |
|---|-------------|-------------|-------------|
| N | -5.04703000 | -1.07019300 | -0.36095500 |
| C | -5.04881800 | -0.46222500 | -1.57477900 |
| N | -3.85115100 | -0.52469700 | -2.12219900 |
| C | -3.05566300 | -1.24952400 | -1.25488900 |
| C | -1.68054600 | -1.64384700 | -1.34426400 |
| O | -0.92030500 | -1.43937500 | -2.28205900 |
| N | -1.29340500 | -2.32793800 | -0.19771800 |
| C | -2.11723700 | -2.65360300 | 0.85926200  |
| N | -1.59053000 | -3.34363100 | 1.86140200  |
| N | -3.39731700 | -2.30561800 | 0.91624200  |
| C | -3.78824700 | -1.60684000 | -0.14327100 |
| H | -5.90361000 | 0.02923200  | -2.01071100 |
| H | -0.29618600 | -2.60650100 | -0.19362700 |
| H | -0.59988200 | -3.57764000 | 1.88072500  |
| H | -2.21664700 | -3.71474300 | 2.55533100  |
| N | -2.53825200 | 2.38370000  | 0.75431700  |
| C | -3.26361800 | 1.97699500  | -0.31952500 |
| N | -2.48592400 | 1.78049000  | -1.36837000 |
| C | -1.17648500 | 2.03325700  | -0.96273600 |
| C | 0.11669400  | 1.85123200  | -1.56998800 |
| O | 0.28974300  | 1.50644700  | -2.77796600 |

|   |             |             |             |
|---|-------------|-------------|-------------|
| N | 1.17384600  | 2.07311500  | -0.75789700 |
| C | 0.99592900  | 2.55434300  | 0.50605000  |
| N | 2.08600000  | 2.92081100  | 1.19462100  |
| N | -0.17313200 | 2.71874400  | 1.13451600  |
| C | -1.20315500 | 2.41503300  | 0.36937100  |
| H | -4.33036100 | 1.83213500  | -0.30822500 |
| H | 2.52643700  | 1.41105300  | -1.43979900 |
| H | 2.99987000  | 2.62978400  | 0.89273900  |
| H | 1.94856800  | 3.28458800  | 2.12262200  |
| N | 5.72015800  | 0.55150100  | -1.22276300 |
| C | 4.41002000  | 0.88487000  | -0.80924600 |
| O | 4.11554900  | 1.10607800  | 0.33916700  |
| N | 3.46620500  | 0.98275500  | -1.80435900 |
| C | 3.67766900  | 0.65426200  | -3.08973700 |
| N | 2.68043400  | 0.80931000  | -3.93269800 |
| C | 4.96783100  | 0.14518600  | -3.44689500 |
| C | 5.94161600  | 0.13542700  | -2.50292100 |
| H | 1.75303700  | 1.12752200  | -3.56817300 |
| H | 2.81889300  | 0.64030800  | -4.91553300 |
| H | 5.17560900  | -0.17376000 | -4.45669100 |
| H | 6.94745400  | -0.19741500 | -2.73636200 |
| N | 3.34450400  | -2.87863800 | 1.22418300  |
| C | 1.96424100  | -2.88862000 | 0.92391300  |
| O | 1.14455500  | -3.14092700 | 1.79296600  |
| N | 1.58073400  | -2.61267400 | -0.34765700 |
| C | 2.45879500  | -2.39643000 | -1.30585000 |
| N | 1.98163400  | -2.07559100 | -2.51946700 |
| C | 3.86887800  | -2.44449800 | -1.05312000 |
| C | 4.24838000  | -2.65367700 | 0.22804000  |

|    |             |             |             |
|----|-------------|-------------|-------------|
| H  | 0.96806700  | -2.04560800 | -2.62493400 |
| H  | 2.56289900  | -2.17224600 | -3.33354000 |
| H  | 4.59750100  | -2.30676100 | -1.83811300 |
| H  | 5.29248900  | -2.65309100 | 0.51142700  |
| Pt | -2.93996200 | 0.97681600  | -3.18542400 |
| N  | -3.29654800 | -0.06007800 | -4.97833100 |
| N  | -1.89174500 | 2.55543500  | -4.05262200 |
| H  | -4.26252300 | -0.37348300 | -5.04146100 |
| H  | -3.07338800 | 0.41334400  | -5.84961100 |
| H  | -2.13900900 | 3.44431800  | -3.62183000 |
| H  | -0.90778300 | 2.34714800  | -3.78214700 |
| H  | -2.72120900 | -0.90305500 | -4.92975900 |
| H  | -1.94783300 | 2.68590200  | -5.05803400 |

**Method 1 – G7C rare tautomer**

|   |             |             |             |
|---|-------------|-------------|-------------|
| N | -5.05179200 | -1.06350300 | -0.36884800 |
| C | -5.04367700 | -0.44515400 | -1.57681200 |
| N | -3.83591700 | -0.50225200 | -2.10941800 |
| C | -3.04462800 | -1.23385500 | -1.24138400 |
| C | -1.66180000 | -1.60535700 | -1.27282400 |
| O | -0.90843600 | -1.29045800 | -2.22678900 |
| N | -1.23889700 | -2.31119000 | -0.19414500 |
| C | -2.10064700 | -2.64085600 | 0.81221500  |
| N | -1.62305400 | -3.34541400 | 1.84592800  |
| N | -3.39872800 | -2.30697200 | 0.89675600  |
| C | -3.79331100 | -1.60269900 | -0.14525900 |
| H | -5.89504300 | 0.04430000  | -2.02119800 |
| H | 0.39747900  | -2.56233000 | -0.29466200 |
| H | -0.67727500 | -3.69876600 | 1.83283700  |

|   |             |             |             |
|---|-------------|-------------|-------------|
| H | -2.29471800 | -3.76858800 | 2.46279400  |
| N | -2.53955800 | 2.38308800  | 0.75887700  |
| C | -3.26853500 | 1.98955800  | -0.31939400 |
| N | -2.49487100 | 1.80440000  | -1.37015000 |
| C | -1.18966400 | 2.04430800  | -0.95662300 |
| C | 0.08529500  | 1.85574500  | -1.59068900 |
| O | 0.32050500  | 1.54162200  | -2.76075300 |
| N | 1.12457100  | 2.07879600  | -0.69969900 |
| C | 0.98981600  | 2.55779800  | 0.58582000  |
| N | 2.09570100  | 2.87681500  | 1.24934200  |
| N | -0.18538200 | 2.71738800  | 1.16728600  |
| C | -1.20986500 | 2.41314800  | 0.37873700  |
| H | -4.33448800 | 1.83730300  | -0.30485700 |
| H | 2.05494900  | 1.89315900  | -1.09624300 |
| H | 3.00820100  | 2.61052500  | 0.89661900  |
| H | 1.98252200  | 3.28215900  | 2.16459900  |
| N | 5.77549900  | 0.53134300  | -1.26157500 |
| C | 4.46886100  | 1.01355700  | -1.01092200 |
| O | 4.15172700  | 1.41731600  | 0.09906900  |
| N | 3.57852200  | 1.01944500  | -2.03386900 |
| C | 3.89550200  | 0.55713800  | -3.22491200 |
| N | 2.91383400  | 0.55886800  | -4.15229800 |
| C | 5.18602600  | 0.00454400  | -3.50507100 |
| C | 6.08962600  | 0.03660900  | -2.49728700 |
| H | 2.05745900  | 1.04634500  | -3.88778500 |
| H | 3.13906100  | 0.46624900  | -5.12951200 |
| H | 5.45039400  | -0.38712600 | -4.47563300 |
| H | 7.10540000  | -0.31742900 | -2.64018700 |
| N | 3.29910300  | -2.89668000 | 1.23723700  |

|    |             |             |             |
|----|-------------|-------------|-------------|
| C  | 1.92061600  | -3.00562800 | 1.00121900  |
| O  | 1.15010500  | -3.41016800 | 1.83398600  |
| N  | 1.48279000  | -2.60435000 | -0.23762400 |
| C  | 2.28166200  | -2.19518600 | -1.24248900 |
| N  | 1.71547500  | -1.78052200 | -2.34893500 |
| C  | 3.69649000  | -2.23552900 | -1.01953300 |
| C  | 4.14053900  | -2.54708600 | 0.21928000  |
| H  | 0.67011500  | -1.65366500 | -2.37661300 |
| H  | 2.27928600  | -1.41323500 | -3.10058200 |
| H  | 4.38258800  | -1.99193400 | -1.81611400 |
| H  | 5.19449100  | -2.53514000 | 0.45977100  |
| Pt | -2.93540100 | 0.97183400  | -3.18838600 |
| N  | -3.26421400 | -0.12124600 | -4.94129700 |
| N  | -1.91595900 | 2.55587200  | -4.11654100 |
| H  | -2.68392200 | -0.95749100 | -4.84480700 |
| H  | -4.22748900 | -0.44349300 | -5.00184700 |
| H  | -2.16226000 | 3.44887000  | -3.69339700 |
| H  | -0.92250300 | 2.38395400  | -3.89688500 |
| H  | -3.03126000 | 0.31409200  | -5.82963600 |
| H  | -2.01761200 | 2.66928000  | -5.12092000 |

**Model A – canonical structure**

|   |            |            |             |
|---|------------|------------|-------------|
| N | 4.64004100 | 2.99303700 | -5.79003800 |
| C | 5.28789400 | 2.38642900 | -4.73716900 |
| N | 4.45213700 | 1.91156300 | -3.84458500 |
| C | 3.17685700 | 2.20226700 | -4.30545700 |
| C | 1.88376900 | 1.98274700 | -3.73198800 |
| O | 1.61724500 | 1.25278000 | -2.77096900 |
| C | 1.12069500 | 3.45094000 | -5.53596100 |



|   |             |            |             |
|---|-------------|------------|-------------|
| N | 0.09072200  | 4.12851100 | -6.01884200 |
| N | 2.29292600  | 3.50032300 | -6.15777800 |
| C | 3.27483600  | 2.90845900 | -5.48980500 |
| N | 6.34887500  | 5.10885100 | -0.89142900 |
| C | 6.45402900  | 3.90538200 | -1.53147400 |
| N | 5.47933600  | 3.08455000 | -1.19921700 |
| C | 4.65946900  | 3.79928000 | -0.32379200 |
| C | 3.46237900  | 3.44463900 | 0.38070200  |
| O | 2.96988200  | 2.31591000 | 0.49516400  |
| N | 2.87361100  | 4.53792700 | 0.98661800  |
| C | 3.39435300  | 5.81311100 | 0.98810500  |
| N | 2.66028800  | 6.75859100 | 1.56194500  |
| N | 4.56955500  | 6.10484600 | 0.44979700  |
| C | 5.14957000  | 5.08615500 | -0.17741500 |
| N | -1.95961500 | 5.22215900 | 2.90801200  |
| C | -2.49418400 | 3.96778800 | 2.82945300  |
| C | -1.78310000 | 2.89616700 | 2.43682800  |
| C | -0.41674900 | 3.12512800 | 2.09137300  |
| N | 0.34017600  | 2.07527100 | 1.72668600  |
| N | 0.11662700  | 4.33349900 | 2.10497600  |
| C | -0.60682200 | 5.43330900 | 2.52002100  |
| O | -0.10347500 | 6.54212700 | 2.55801000  |
| N | -3.08608400 | 4.78189300 | -2.28526400 |
| C | -3.45109400 | 4.11025700 | -1.15630700 |
| C | -2.85221100 | 2.95253400 | -0.80434800 |
| C | -1.75939600 | 2.51451400 | -1.62140800 |
| N | -1.02655600 | 1.44769900 | -1.26989100 |
| N | -1.43205700 | 3.13419500 | -2.74289900 |
| C | -2.12503900 | 4.22638500 | -3.16150700 |

|    |             |             |             |
|----|-------------|-------------|-------------|
| O  | -1.92375400 | 4.72741700  | -4.26249100 |
| Pt | 4.84524900  | 1.24151800  | -1.93330200 |
| N  | 5.13126300  | 0.56798700  | 0.02141900  |
| N  | 3.93200700  | -0.50988600 | -2.58843600 |
| N  | 0.90675400  | 2.69638400  | -4.39907400 |
| H  | 6.35073800  | 2.24357000  | -4.65571400 |
| H  | -0.75036200 | 4.28961300  | -5.44922000 |
| H  | 0.27708800  | 4.71426400  | -6.81786100 |
| H  | 7.23953700  | 3.69517800  | -2.23842000 |
| H  | 1.95009600  | 4.40629200  | 1.44484500  |
| H  | 1.73666000  | 6.59180100  | 1.97385900  |
| H  | 3.05319200  | 7.68477400  | 1.59622200  |
| H  | -3.53255500 | 3.86305700  | 3.10639400  |
| H  | -2.22689200 | 1.91307500  | 2.41154500  |
| H  | 1.30025300  | 2.18788300  | 1.40860800  |
| H  | -0.00267900 | 1.14172700  | 1.87354300  |
| H  | -4.23518600 | 4.56184800  | -0.56030000 |
| H  | -3.15773200 | 2.41317800  | 0.07661700  |
| H  | -0.16407300 | 1.27094600  | -1.77819900 |
| H  | -1.14192700 | 1.05115700  | -0.35501600 |
| H  | 4.32274300  | 0.94599700  | 0.53650900  |
| H  | 5.18062300  | -0.43716500 | 0.16262500  |
| H  | 2.94030200  | -0.23260000 | -2.64560300 |
| H  | 4.24109200  | -0.76934700 | -3.52313200 |
| H  | 5.97376100  | 0.97098800  | 0.42669700  |
| H  | 4.01337800  | -1.33310600 | -1.99837700 |
| H  | -0.02239200 | 2.73106600  | -3.92539900 |

**Model A – G6C rare tautomer**

|   |             |            |             |
|---|-------------|------------|-------------|
| N | 4.63583600  | 2.99451600 | -5.78799900 |
| C | 5.27279000  | 2.39204300 | -4.72509300 |
| N | 4.42895800  | 1.90962000 | -3.84482300 |
| C | 3.15782500  | 2.19538800 | -4.32115800 |
| C | 1.85393200  | 1.96357800 | -3.76690800 |
| O | 1.55561900  | 1.21479500 | -2.83627000 |
| C | 1.11963700  | 3.45749500 | -5.57238900 |
| N | 0.09070200  | 4.13339500 | -6.07595600 |
| N | 2.29337300  | 3.50257800 | -6.18028100 |
| C | 3.26928700  | 2.90444800 | -5.50145300 |
| N | 6.34633000  | 5.11177600 | -0.88729900 |
| C | 6.40383600  | 3.91431200 | -1.54133900 |
| N | 5.40769200  | 3.12015500 | -1.19899400 |
| C | 4.61623300  | 3.84479300 | -0.29944700 |
| C | 3.40411400  | 3.56631700 | 0.42448800  |
| O | 2.89249400  | 2.40564600 | 0.49864100  |
| N | 2.82847500  | 4.61350200 | 1.05159600  |
| C | 3.42332200  | 5.83313900 | 1.02553000  |
| N | 2.75289400  | 6.85828900 | 1.58743500  |
| N | 4.60598900  | 6.12967700 | 0.48078900  |
| C | 5.15361500  | 5.11098900 | -0.15711100 |
| N | -1.93321600 | 5.24162500 | 2.91619300  |
| C | -2.45440100 | 3.99051000 | 2.70988200  |
| C | -1.74551700 | 2.96169600 | 2.20709300  |
| C | -0.37357000 | 3.18406300 | 1.87505600  |
| N | 0.39197400  | 2.26454700 | 1.34665000  |
| N | 0.13618100  | 4.40532200 | 2.14688500  |
| C | -0.57225400 | 5.49522500 | 2.65703500  |

|    |             |             |             |
|----|-------------|-------------|-------------|
| O  | -0.03183100 | 6.55437100  | 2.83761800  |
| N  | -3.10393800 | 4.77805800  | -2.25682800 |
| C  | -3.63623400 | 4.05520700  | -1.23086500 |
| C  | -3.13903700 | 2.84597700  | -0.88480600 |
| C  | -1.98479200 | 2.39858200  | -1.60182300 |
| N  | -1.34833800 | 1.24808700  | -1.22685900 |
| N  | -1.46106500 | 3.08518100  | -2.59068400 |
| C  | -2.03939600 | 4.24589200  | -3.02162000 |
| O  | -1.66073800 | 4.80089900  | -4.04176300 |
| Pt | 4.78517200  | 1.28111200  | -1.90161900 |
| N  | 5.00035600  | 0.68782600  | 0.07798100  |
| N  | 3.90870900  | -0.50663300 | -2.53627800 |
| N  | 0.89128100  | 2.70472200  | -4.43872500 |
| H  | 6.33585300  | 2.26367000  | -4.62472100 |
| H  | -0.71069800 | 4.34256600  | -5.48063900 |
| H  | 0.29727600  | 4.73262900  | -6.85960800 |
| H  | 7.17553500  | 3.68118700  | -2.25582800 |
| H  | 1.12909000  | 4.57868300  | 1.85301000  |
| H  | 1.94882200  | 6.70528900  | 2.17986500  |
| H  | 3.24425900  | 7.73208300  | 1.66217000  |
| H  | -3.49148100 | 3.85652400  | 2.98275800  |
| H  | -2.18810700 | 1.98638600  | 2.08293300  |
| H  | 1.40662000  | 2.40783700  | 1.05606800  |
| H  | -0.05913500 | 1.42178800  | 1.02107900  |
| H  | -4.46782500 | 4.51067000  | -0.70583000 |
| H  | -3.58015600 | 2.27028700  | -0.08728200 |
| H  | -0.59281900 | 0.98278100  | -1.85415700 |
| H  | -1.93927400 | 0.49416700  | -0.90844500 |
| H  | 4.18615800  | 1.14541800  | 0.53313200  |

|   |             |             |             |
|---|-------------|-------------|-------------|
| H | 4.99204700  | -0.30803900 | 0.27694700  |
| H | 2.91613600  | -0.24905900 | -2.63181300 |
| H | 4.25093000  | -0.78905000 | -3.45217800 |
| H | 5.84824800  | 1.07477300  | 0.48665800  |
| H | 3.98619400  | -1.30954600 | -1.91887800 |
| H | -0.03379500 | 2.72337800  | -3.98253600 |

**Model A – G7C rare tautomer**

|   |            |            |             |
|---|------------|------------|-------------|
| N | 4.64603900 | 2.99161900 | -5.79356400 |
| C | 5.27455700 | 2.41318300 | -4.71444700 |
| N | 4.41936300 | 1.94742200 | -3.83400400 |
| C | 3.14889600 | 2.21629700 | -4.32659700 |
| C | 1.83256100 | 2.03953800 | -3.79239900 |
| O | 1.60070800 | 1.29535800 | -2.79126200 |
| C | 1.12639900 | 3.42240900 | -5.56194600 |
| N | 0.12845100 | 4.12149400 | -6.11561800 |
| N | 2.30229800 | 3.47661000 | -6.20058900 |
| C | 3.27497200 | 2.90032500 | -5.51983500 |
| N | 6.34950000 | 5.10800600 | -0.89036600 |
| C | 6.44915600 | 3.90184600 | -1.52890000 |
| N | 5.47751900 | 3.08175800 | -1.18855000 |
| C | 4.66398600 | 3.79887300 | -0.30927400 |
| C | 3.46696400 | 3.45220800 | 0.39927200  |
| O | 2.95804500 | 2.33200800 | 0.52428800  |
| N | 2.88687500 | 4.55367900 | 1.00343900  |
| C | 3.41053900 | 5.82662000 | 0.99735600  |
| N | 2.67980300 | 6.77925100 | 1.56871800  |
| N | 4.58129900 | 6.11128100 | 0.45412700  |
| C | 5.15660000 | 5.08595400 | -0.17020900 |

|    |             |             |             |
|----|-------------|-------------|-------------|
| N  | -1.96695700 | 5.21641700  | 2.90915400  |
| C  | -2.50082100 | 3.96083700  | 2.86456600  |
| C  | -1.79284900 | 2.88129200  | 2.48724200  |
| C  | -0.43994700 | 3.10962400  | 2.09762000  |
| N  | 0.28935300  | 2.04947800  | 1.66600200  |
| N  | 0.09680600  | 4.31098900  | 2.09126700  |
| C  | -0.61554300 | 5.41997900  | 2.51476600  |
| O  | -0.10606700 | 6.52318000  | 2.54798300  |
| N  | -3.06311400 | 4.78541900  | -2.31495200 |
| C  | -3.23274500 | 4.16463800  | -1.11126300 |
| C  | -2.50802700 | 3.08369900  | -0.75321300 |
| C  | -1.47020200 | 2.63802800  | -1.63149500 |
| N  | -0.59388300 | 1.71590500  | -1.31215100 |
| N  | -1.38930100 | 3.21110100  | -2.84702300 |
| C  | -2.17791100 | 4.26010900  | -3.27372600 |
| O  | -2.08089700 | 4.69840200  | -4.39443000 |
| Pt | 4.79840300  | 1.25287400  | -1.94507600 |
| N  | 5.09044500  | 0.53294800  | 0.00138400  |
| N  | 3.82330400  | -0.44633100 | -2.62895600 |
| N  | 0.85284400  | 2.71884900  | -4.42508000 |
| H  | 6.33554200  | 2.27527600  | -4.60585400 |
| H  | -0.75667100 | 4.24218300  | -5.64337400 |
| H  | 0.35016700  | 4.67564000  | -6.92561400 |
| H  | 7.22879500  | 3.69081900  | -2.24211100 |
| H  | 1.96778800  | 4.41967100  | 1.45944800  |
| H  | 1.76222100  | 6.61311100  | 1.98721400  |
| H  | 3.07751300  | 7.70320300  | 1.60166500  |
| H  | -3.53725900 | 3.85988400  | 3.14928300  |
| H  | -2.23698500 | 1.89779700  | 2.47857200  |

|   |             |             |             |
|---|-------------|-------------|-------------|
| H | 1.27159700  | 2.17559200  | 1.41732100  |
| H | 0.01656700  | 1.13188500  | 1.98185600  |
| H | -3.98382500 | 4.58941000  | -0.45666400 |
| H | -2.67222300 | 2.59470400  | 0.19046700  |
| H | 0.22645300  | 1.50753300  | -1.93871700 |
| H | -0.54358000 | 1.43745000  | -0.34286400 |
| H | 4.29903700  | 0.91440600  | 0.53638300  |
| H | 5.11915100  | -0.47602200 | 0.11779500  |
| H | 2.84732300  | -0.10032500 | -2.70891300 |
| H | 4.14214300  | -0.71444100 | -3.55770700 |
| H | 5.94719000  | 0.90686900  | 0.40401000  |
| H | 3.84377700  | -1.27524900 | -2.04233200 |
| H | -0.60282400 | 2.93582400  | -3.51855100 |

**Model B – canonical structure**

|   |            |            |             |
|---|------------|------------|-------------|
| N | 4.64597600 | 2.98820900 | -5.78883400 |
| C | 5.29467500 | 2.38821500 | -4.73068600 |
| N | 4.45698100 | 1.91014900 | -3.84343300 |
| C | 3.18058300 | 2.18068600 | -4.31290300 |
| C | 1.88737300 | 1.97227100 | -3.73511400 |
| O | 1.61514400 | 1.25796400 | -2.76474300 |
| C | 1.12524900 | 3.41515400 | -5.57259000 |
| N | 0.08729000 | 4.05878500 | -6.06350800 |
| N | 2.30704900 | 3.47084900 | -6.18076600 |
| C | 3.27989900 | 2.88609800 | -5.49974600 |
| N | 6.35071600 | 5.10599200 | -0.88929100 |
| C | 6.44526100 | 3.90721800 | -1.54248100 |
| N | 5.46689700 | 3.09171200 | -1.21309200 |
| C | 4.65684100 | 3.79751400 | -0.32101300 |

|    |             |             |             |
|----|-------------|-------------|-------------|
| C  | 3.44039000  | 3.45767600  | 0.35549500  |
| O  | 2.91349800  | 2.34058100  | 0.42762200  |
| N  | 2.87311900  | 4.55121200  | 0.97672500  |
| C  | 3.41736200  | 5.82193300  | 1.01459800  |
| N  | 2.70457000  | 6.76404800  | 1.60523500  |
| N  | 4.59817600  | 6.09919300  | 0.47110800  |
| C  | 5.15799200  | 5.08017900  | -0.16247200 |
| N  | -1.96284200 | 5.21661100  | 2.90978800  |
| C  | -2.51898100 | 3.96553200  | 2.81772700  |
| C  | -1.82714900 | 2.89437400  | 2.40284000  |
| C  | -0.45566500 | 3.10669500  | 2.05569300  |
| N  | 0.27109600  | 2.05756000  | 1.67604700  |
| N  | 0.09851700  | 4.31504100  | 2.10997400  |
| C  | -0.61309900 | 5.39880200  | 2.53348900  |
| O  | -0.10068600 | 6.51671300  | 2.58292600  |
| N  | -3.08331800 | 4.78025200  | -2.27461400 |
| C  | -3.50342200 | 4.08391200  | -1.17203700 |
| C  | -2.93966800 | 2.90687900  | -0.82777500 |
| C  | -1.83240000 | 2.45325900  | -1.62430700 |
| N  | -1.14592200 | 1.36401100  | -1.29006900 |
| N  | -1.44344000 | 3.11717700  | -2.70889100 |
| C  | -2.07192200 | 4.24474700  | -3.09471800 |
| O  | -1.76882500 | 4.81454000  | -4.14763000 |
| Pt | 4.82744300  | 1.24688000  | -1.92590000 |
| N  | 5.07603200  | 0.59512500  | 0.04184900  |
| N  | 3.89995000  | -0.50316700 | -2.56700300 |
| N  | 0.91905200  | 2.68476600  | -4.41185000 |
| H  | 6.35780100  | 2.24579100  | -4.63877500 |
| H  | -0.76710900 | 4.12304500  | -5.51469200 |



|   |             |             |             |
|---|-------------|-------------|-------------|
| H | 0.12366400  | 4.56819000  | -6.94711000 |
| H | 7.22875900  | 3.68827400  | -2.25000000 |
| H | 1.95876800  | 4.41247600  | 1.44571200  |
| H | 1.79698000  | 6.56426100  | 2.02731200  |
| H | 3.11208100  | 7.69058700  | 1.75476600  |
| H | -3.55468300 | 3.86351200  | 3.10895200  |
| H | -2.27157700 | 1.91234000  | 2.37741200  |
| H | 1.22111600  | 2.16369100  | 1.32886100  |
| H | -0.18960300 | 1.15887300  | 1.60603300  |
| H | -4.29977700 | 4.53082600  | -0.58628600 |
| H | -3.28014700 | 2.36100700  | 0.03815600  |
| H | -0.31528000 | 1.14594800  | -1.83142000 |
| H | -1.39504100 | 0.80301600  | -0.48268300 |
| H | 4.24554700  | 0.96042700  | 0.53239200  |
| H | 5.13968600  | -0.40759400 | 0.19643400  |
| H | 2.90850200  | -0.21961900 | -2.61855600 |
| H | 4.19659300  | -0.77666300 | -3.50166600 |
| H | 5.89551600  | 1.01608100  | 0.47530000  |
| H | 3.97830800  | -1.32234800 | -1.97046900 |
| H | -0.01317800 | 2.69933200  | -3.95542400 |
| O | -0.90679900 | 5.71375500  | -8.09218900 |
| H | -1.32228400 | 6.29649600  | -7.43391100 |
| H | -1.62697600 | 5.42035100  | -8.65729200 |
| H | -1.56563700 | 6.37149700  | -5.15271000 |
| O | -1.61438500 | 7.11052100  | -5.77525100 |
| H | -0.88545300 | 7.69775300  | -5.56294400 |
| O | -4.32756800 | 0.21481000  | 1.94951600  |
| H | -4.91186000 | -0.53535700 | 2.08835200  |
| H | -4.86860900 | 0.89471800  | 1.51068200  |

|   |             |             |            |
|---|-------------|-------------|------------|
| O | -5.92916900 | 2.29180500  | 0.90708900 |
| H | -6.51062400 | 2.18825100  | 0.14880200 |
| H | -6.50449700 | 2.57928800  | 1.62537900 |
| O | -1.73016400 | -0.17368300 | 1.16580600 |
| H | -1.49404400 | -1.10221100 | 1.23425300 |
| H | -2.66914300 | -0.10546200 | 1.43336100 |
| H | -0.60327700 | 8.36851700  | 2.47195100 |
| O | -0.89908000 | 9.07060500  | 3.06708000 |
| H | -0.66934300 | 9.90468700  | 2.64966100 |
| H | 0.58797600  | 8.49724500  | 4.18813300 |
| O | 1.50971500  | 8.39065600  | 4.46935200 |
| H | 1.67178500  | 7.44403600  | 4.53069900 |
| O | 3.17003200  | 9.37057400  | 2.55904300 |
| H | 2.63975800  | 9.15839800  | 3.35315700 |
| H | 3.74334700  | 10.10360100 | 2.78960300 |

**Model B – G6C rare tautomer**

|   |            |            |             |
|---|------------|------------|-------------|
| N | 4.64583900 | 2.98791700 | -5.78877400 |
| C | 5.28912200 | 2.38917100 | -4.72537700 |
| N | 4.44824000 | 1.90263700 | -3.84718500 |
| C | 3.17408000 | 2.16818600 | -4.32633700 |
| C | 1.87631300 | 1.95220500 | -3.76013100 |
| O | 1.58710300 | 1.23149400 | -2.80001000 |
| C | 1.12786800 | 3.41050700 | -5.59403800 |
| N | 0.09139500 | 4.06050100 | -6.08470400 |
| N | 2.31027800 | 3.46897100 | -6.19475300 |
| C | 3.27983600 | 2.87965100 | -5.50894600 |
| N | 6.33964600 | 5.10727200 | -0.88631100 |
| C | 6.40020500 | 3.91054600 | -1.54574600 |

|    |             |             |             |
|----|-------------|-------------|-------------|
| N  | 5.40434800  | 3.11435500  | -1.21095200 |
| C  | 4.60550800  | 3.82436300  | -0.30485200 |
| C  | 3.36958500  | 3.54480300  | 0.39003300  |
| O  | 2.83882300  | 2.39019500  | 0.44235900  |
| N  | 2.79260300  | 4.59289400  | 1.01059300  |
| C  | 3.39881600  | 5.81444000  | 1.00979500  |
| N  | 2.72620200  | 6.82616000  | 1.56852600  |
| N  | 4.59336600  | 6.10897100  | 0.47854800  |
| C  | 5.14240000  | 5.09395100  | -0.15494900 |
| N  | -1.94576700 | 5.22518000  | 2.90898000  |
| C  | -2.47057000 | 3.95753600  | 2.78778000  |
| C  | -1.76881900 | 2.90098800  | 2.34327000  |
| C  | -0.40657200 | 3.10302300  | 1.95415000  |
| N  | 0.35164600  | 2.14057200  | 1.50351300  |
| N  | 0.08649000  | 4.36062800  | 2.07070700  |
| C  | -0.61269000 | 5.45338500  | 2.56075400  |
| O  | -0.07593300 | 6.53386500  | 2.66039900  |
| N  | -3.08322300 | 4.78003200  | -2.27487800 |
| C  | -3.52983500 | 4.06506100  | -1.19740100 |
| C  | -2.97458100 | 2.88040700  | -0.85952600 |
| C  | -1.85354300 | 2.43544100  | -1.64453500 |
| N  | -1.16645700 | 1.34333600  | -1.31206400 |
| N  | -1.44476000 | 3.11365800  | -2.70873300 |
| C  | -2.06274000 | 4.24847900  | -3.09204700 |
| O  | -1.74430300 | 4.82910200  | -4.13063500 |
| Pt | 4.78755700  | 1.27336600  | -1.90439600 |
| N  | 4.96804200  | 0.69599400  | 0.08399900  |
| N  | 3.90031400  | -0.51089000 | -2.53641300 |
| N  | 0.91419300  | 2.67145500  | -4.44191600 |

|   |             |             |             |
|---|-------------|-------------|-------------|
| H | 6.35252900  | 2.25847500  | -4.62132000 |
| H | -0.76560300 | 4.11610400  | -5.54330700 |
| H | 0.12840200  | 4.57256400  | -6.96589400 |
| H | 7.17591300  | 3.67141300  | -2.25488700 |
| H | 1.08543000  | 4.52420800  | 1.75550500  |
| H | 1.89901600  | 6.63837900  | 2.11301300  |
| H | 3.18995600  | 7.71826800  | 1.72218600  |
| H | -3.50437900 | 3.83822800  | 3.07985900  |
| H | -2.20634500 | 1.91683500  | 2.29536200  |
| H | 1.33461800  | 2.28768800  | 1.13879600  |
| H | -0.08603700 | 1.22822300  | 1.41168000  |
| H | -4.34355800 | 4.50092400  | -0.62718800 |
| H | -3.34907200 | 2.31186700  | -0.02267900 |
| H | -0.34769600 | 1.11788500  | -1.87102400 |
| H | -1.45595400 | 0.74025100  | -0.55132400 |
| H | 4.13389200  | 1.14604700  | 0.51363200  |
| H | 4.96687600  | -0.29805000 | 0.29331800  |
| H | 2.90611900  | -0.24960200 | -2.61175000 |
| H | 4.22056600  | -0.79221400 | -3.46057300 |
| H | 5.79644900  | 1.09700500  | 0.51830000  |
| H | 3.98568900  | -1.31840600 | -1.92575600 |
| H | -0.01933500 | 2.67899700  | -3.99701100 |
| O | -0.90679900 | 5.71375400  | -8.09219200 |
| H | -1.32228400 | 6.29649600  | -7.43391100 |
| H | -1.62697600 | 5.42035200  | -8.65729200 |
| H | -1.56566600 | 6.37151800  | -5.15268100 |
| O | -1.61436100 | 7.11050600  | -5.77527000 |
| H | -0.88545300 | 7.69775300  | -5.56294400 |
| O | -4.32756400 | 0.21480600  | 1.94953300  |

|   |             |             |            |
|---|-------------|-------------|------------|
| H | -4.91186000 | -0.53535700 | 2.08835200 |
| H | -4.86860900 | 0.89471800  | 1.51068200 |
| O | -5.92916900 | 2.29180500  | 0.90708900 |
| H | -6.51062400 | 2.18825100  | 0.14880200 |
| H | -6.50449700 | 2.57928800  | 1.62537900 |
| O | -1.73013000 | -0.17369000 | 1.16582100 |
| H | -1.49406400 | -1.10221500 | 1.23426500 |
| H | -2.66915500 | -0.10545000 | 1.43331600 |
| H | -0.60329000 | 8.36851200  | 2.47195100 |
| O | -0.89907200 | 9.07061000  | 3.06707800 |
| H | -0.66934200 | 9.90468700  | 2.64966200 |
| H | 0.58797500  | 8.49724400  | 4.18813400 |
| O | 1.50973700  | 8.39063800  | 4.46936200 |
| H | 1.67178500  | 7.44403600  | 4.53069900 |
| O | 3.17007700  | 9.37053900  | 2.55906400 |
| H | 2.63969400  | 9.15845000  | 3.35312800 |
| H | 3.74334800  | 10.10360100 | 2.78960200 |

**Model B – G7C rare tautomer**

|   |            |            |             |
|---|------------|------------|-------------|
| N | 4.63965900 | 2.99201900 | -5.78056100 |
| C | 5.27270600 | 2.41691800 | -4.69846100 |
| N | 4.42078500 | 1.95940400 | -3.81094600 |
| C | 3.14271900 | 2.21827700 | -4.29172300 |
| C | 1.82351200 | 2.05756200 | -3.73567700 |
| O | 1.57758700 | 1.34274700 | -2.71864000 |
| C | 1.11576600 | 3.40768800 | -5.54079800 |
| N | 0.11450200 | 4.07888800 | -6.10043700 |
| N | 2.29781800 | 3.46831500 | -6.17469400 |
| C | 3.26720600 | 2.89835500 | -5.49211600 |

|    |             |            |             |
|----|-------------|------------|-------------|
| N  | 6.35243800  | 5.10600500 | -0.88677400 |
| C  | 6.44817400  | 3.90213000 | -1.53152300 |
| N  | 5.47895000  | 3.08362600 | -1.18637400 |
| C  | 4.67287000  | 3.79212300 | -0.29298000 |
| C  | 3.46334400  | 3.45470200 | 0.39683600  |
| O  | 2.93347400  | 2.34093900 | 0.49356400  |
| N  | 2.89642700  | 4.55613800 | 1.00743100  |
| C  | 3.43208900  | 5.82959500 | 1.02406500  |
| N  | 2.71260300  | 6.77690400 | 1.60243800  |
| N  | 4.60630100  | 6.10536300 | 0.47309700  |
| C  | 5.16776900  | 5.07924100 | -0.15145500 |
| N  | -1.96471900 | 5.21583700 | 2.90958800  |
| C  | -2.51494600 | 3.96194600 | 2.83426200  |
| C  | -1.81966100 | 2.88857100 | 2.42821400  |
| C  | -0.44951500 | 3.10447400 | 2.07327700  |
| N  | 0.28002900  | 2.05656100 | 1.69174600  |
| N  | 0.09686200  | 4.31522200 | 2.10824200  |
| C  | -0.61542300 | 5.40042800 | 2.52803400  |
| O  | -0.10876900 | 6.51907400 | 2.56806300  |
| N  | -3.06024400 | 4.78143700 | -2.29170600 |
| C  | -3.39060200 | 4.07601800 | -1.16271700 |
| C  | -2.76624100 | 2.92381500 | -0.82941600 |
| C  | -1.65393900 | 2.48605500 | -1.62521800 |
| N  | -0.89612800 | 1.46231800 | -1.31824400 |
| N  | -1.36585800 | 3.19643200 | -2.73871100 |
| C  | -2.08932100 | 4.28243900 | -3.16453700 |
| O  | -1.87368200 | 4.78493000 | -4.24579200 |
| Pt | 4.78800200  | 1.25984600 | -1.92348600 |
| N  | 5.05567600  | 0.54954900 | 0.03121500  |

|   |             |             |             |
|---|-------------|-------------|-------------|
| N | 3.77394600  | -0.42319200 | -2.59375100 |
| N | 0.84747100  | 2.73281900  | -4.37887700 |
| H | 6.33381000  | 2.26902900  | -4.59262200 |
| H | -0.79531700 | 4.05750200  | -5.67463800 |
| H | 0.20697200  | 4.54613700  | -6.99570500 |
| H | 7.22376300  | 3.68418400  | -2.24798400 |
| H | 1.98730600  | 4.41742300  | 1.47922700  |
| H | 1.81258000  | 6.57339100  | 2.03439200  |
| H | 3.11859900  | 7.70409200  | 1.74937300  |
| H | -3.54865400 | 3.85862300  | 3.13242000  |
| H | -2.25776900 | 1.90289400  | 2.42316300  |
| H | 1.24468700  | 2.15925000  | 1.37974300  |
| H | -0.15512700 | 1.14292000  | 1.69603700  |
| H | -4.17705100 | 4.49393200  | -0.54389400 |
| H | -3.04773600 | 2.37868500  | 0.05751600  |
| H | -0.02737500 | 1.29156500  | -1.85996900 |
| H | -1.12471200 | 0.90024100  | -0.50015600 |
| H | 4.24910600  | 0.92435500  | 0.55051200  |
| H | 5.09169800  | -0.45848700 | 0.15560300  |
| H | 2.80123500  | -0.05784000 | -2.64248500 |
| H | 4.05693800  | -0.69532200 | -3.53281200 |
| H | 5.89758400  | 0.93236000  | 0.45616100  |
| H | 3.79601900  | -1.25495600 | -2.01084000 |
| H | -0.55466400 | 2.91927900  | -3.40550900 |
| O | -0.90681200 | 5.71374500  | -8.09219600 |
| H | -1.32227100 | 6.29650400  | -7.43391000 |
| H | -1.62697500 | 5.42035400  | -8.65729400 |
| H | -1.56569100 | 6.37153900  | -5.15265800 |
| O | -1.61434600 | 7.11049100  | -5.77528400 |

|   |             |             |             |
|---|-------------|-------------|-------------|
| H | -0.88545100 | 7.69775100  | -5.56294600 |
| O | -4.32755800 | 0.21480300  | 1.94951500  |
| H | -4.91186600 | -0.53535100 | 2.08835900  |
| H | -4.86861500 | 0.89471400  | 1.51068400  |
| O | -5.92916800 | 2.29180600  | 0.90708900  |
| H | -6.51062400 | 2.18825100  | 0.14880200  |
| H | -6.50449700 | 2.57928800  | 1.62537900  |
| O | -1.73009500 | -0.17372100 | 1.16579200  |
| H | -1.49409100 | -1.10222100 | 1.23427800  |
| H | -2.66914600 | -0.10542500 | 1.43334000  |
| H | -0.60327700 | 8.36852100  | 2.47195000  |
| O | -0.89908000 | 9.07060400  | 3.06708100  |
| H | -0.66934400 | 9.90468700  | 2.64966100  |
| H | 0.58797600  | 8.49724500  | 4.18813300  |
| O | 1.50969600  | 8.39067200  | 4.46934400  |
| H | 1.67178500  | 7.44403600  | 4.53069900  |
| O | 3.16999100  | 9.37060400  | 2.55902100  |
| H | 2.63981300  | 9.15835500  | 3.35318200  |
| H | 3.74334800  | 10.10359900 | 2.78960600  |



Table S1: Partial Charges on cisplatin and bound guanines.

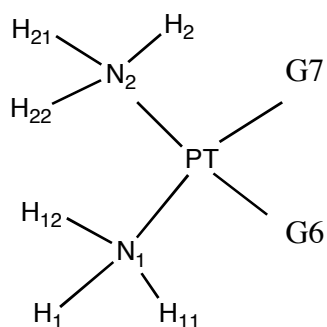

| Atom Name | Cisplatin Charges | Atom Name | G6 charges | G7 charges |
|-----------|-------------------|-----------|------------|------------|
| PT        | 0.870             | N1        | -0.279     | -0.253     |
| N1        | -0.381            | H1        | 0.318      | 0.322      |
| H1        | 0.281             | C2        | 0.306      | 0.391      |
| H11       | -0.011            | N2        | -0.434     | -0.428     |
| H12       | 0.274             | H21       | 0.274      | 0.272      |
| N2        | -0.432            | H22       | 0.349      | 0.353      |
| H2        | 0.154             | N3        | -0.115     | -0.114     |
| H21       | -0.014            | C4        | -0.156     | -0.163     |
| H22       | 0.180             | C5        | 0.156      | 0.269      |
|           |                   | C6        | -0.125     | -0.165     |
|           |                   | O6        | -0.323     | 0.293      |
|           |                   | N7        | -0.106     | -0.002     |
|           |                   | C8        | -0.016     | -0.245     |
|           |                   | H8        | 0.000      | -0.327     |
|           |                   | N9        | -0.018     | -0.036     |
|           |                   | H9        | -0.167     | -0.166     |
